# Supplementary material
Source: Springer Nature journal article supplement (https://www.springermedizin.de/resource/supplementary/12889_2009_1954_MOESM3_ESM.pdf/9485450)
Supplement: MOESM3 [file 9485450]

Iterative process between purpose and questions

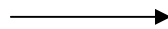

Decision about methods

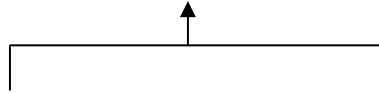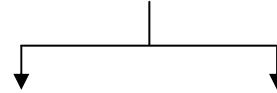

| <b>Research purposes</b>     | <b>Theoretical drive</b> | <b>Research questions</b>                                                                                                                                                                                                                                                                                 | <b>Standard approaches</b> | <b>Opportunities for using MM</b>                                                                             |
|------------------------------|--------------------------|-----------------------------------------------------------------------------------------------------------------------------------------------------------------------------------------------------------------------------------------------------------------------------------------------------------|----------------------------|---------------------------------------------------------------------------------------------------------------|
| Understand complex phenomena | Inductive                | - What are the mechanisms and the contextual factors that allow the school community to develop an HP approach?                                                                                                                                                                                           | Qualitative research       | Standard plus quantitative research using multivariate techniques taking multiple points of view into account |
| Measure change               | Deductive                | - How do the strategies developed through the program influence the development of teachers' HP practices and the schools' health promoting environment?<br>- How do these practices affect well-being in the schools?<br>- What is the influence of the program on the children's perceived life skills? | Quantitative approaches    | Standard plus qualitative research using open-ended process                                                   |
